# Supplementary material for: Controllable wettability and adhesion of superhydrophobic self-assembled surfaces based on a novel azobenzene derivative
Source: Royal Society of Chemistry journal article supplement (doi:10.1039/c7ra08465j), 2017-01-01
Supplement: c7ra08465j1.pdf [file c7ra08465j1.pdf]

## Supporting Information

# Controllable Wettability and Adhesion of Superhydrophobic Self-Assembled Surfaces Based on a Novel Azobenzene Derivative

Qiongqiong Gao, Liu He, Yajie Li, Xia Ran\* and Lijun Guo\*

*Institute of Micro/Nano Photonic Materials and Application, Henan University, Kaifeng 475004, People's Republic of China.*

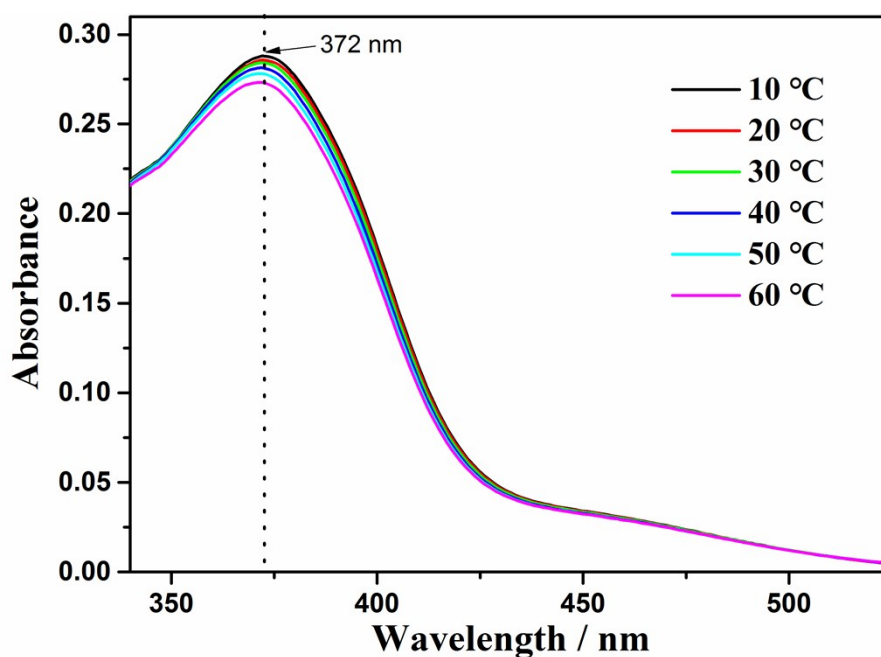

**Fig. S1** Temperature-dependent UV/Vis absorption spectra of AOB-Y8 in 50:50 CHCl<sub>3</sub>/CH<sub>3</sub>CN ( $5 \times 10^{-5}$  M).

---

\*To whom correspondence should be addressed. E-mail: ranxia@henu.edu.cn, juneguo@henu.edu.cn

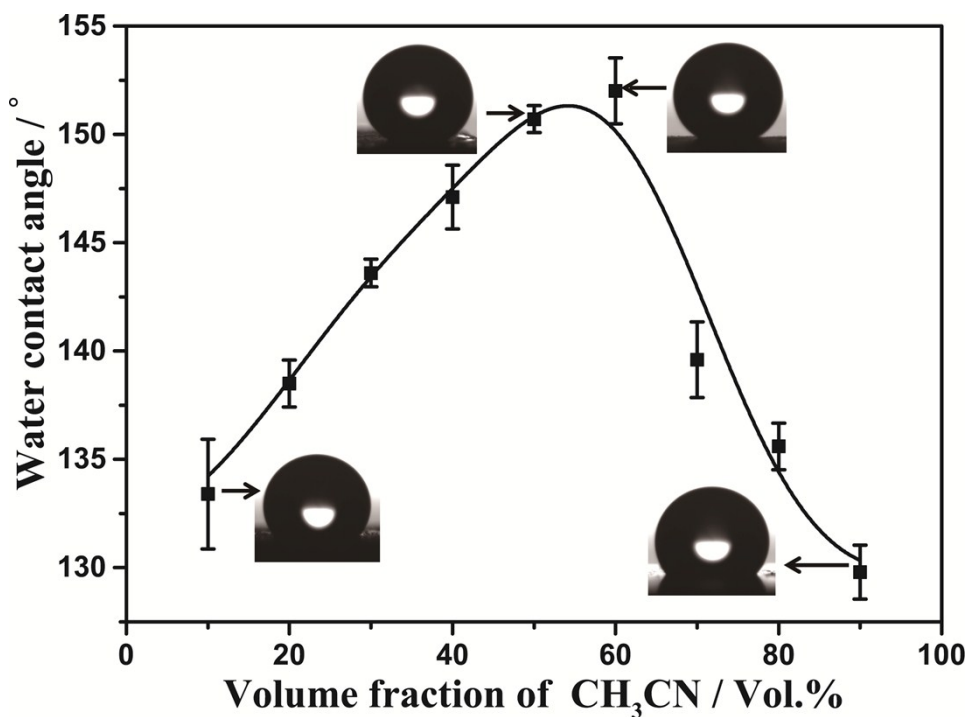

**Fig. S2** Experimental water contact angles of surfaces prepared with different CH<sub>3</sub>CN volume fractions.

Insets are the shapes of water droplets (4  $\mu$ L) on the surface prepared from 1 mg/mL of AOB-Y8 in CHCl<sub>3</sub>/CH<sub>3</sub>CN mixtures.

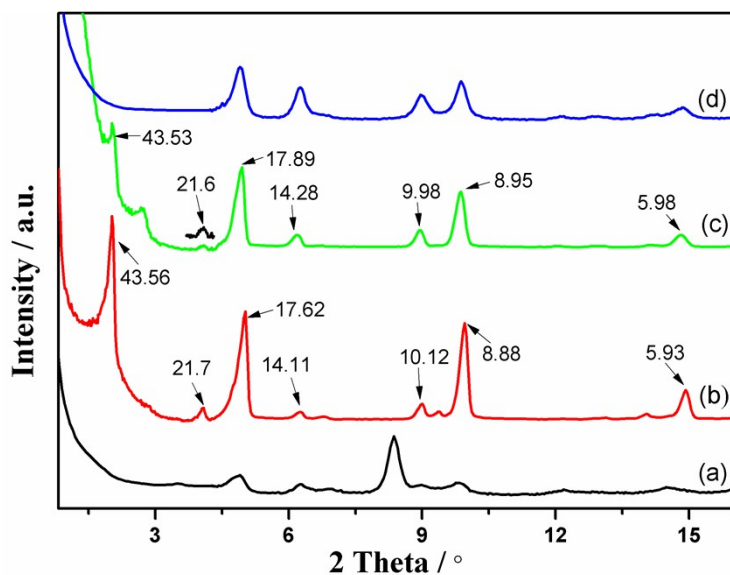

**Fig. S3.** X-ray diffraction patterns of AOB-Y8 surfaces prepared from 3 mg/mL in CHCl<sub>3</sub>:CH<sub>3</sub>CN solution with different solvent ratio: (a) 90:10, (b) 50:50, (c) 40:60, (d) 10:90.

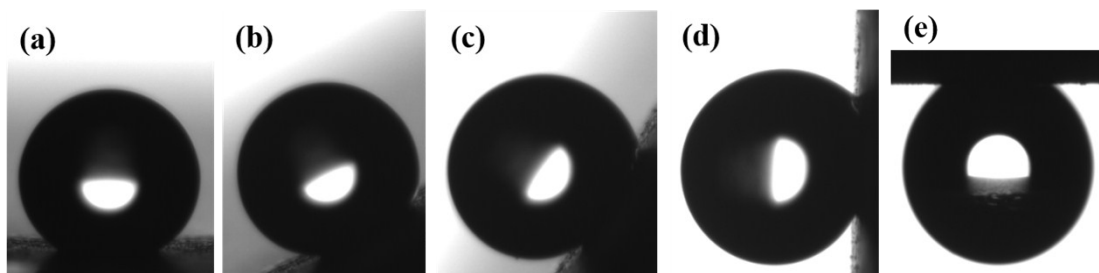

**Fig. S4** Shapes of water droplets (4  $\mu\text{L}$ ) with different title angles: (a)  $0^\circ$ , (b)  $30^\circ$ , (c)  $60^\circ$ , (d)  $90^\circ$  and (e)  $180^\circ$  on the AOB-Y8 surface prepared from 1 mg/mL in 50:50  $\text{CHCl}_3/\text{CH}_3\text{CN}$  mixed solvents.

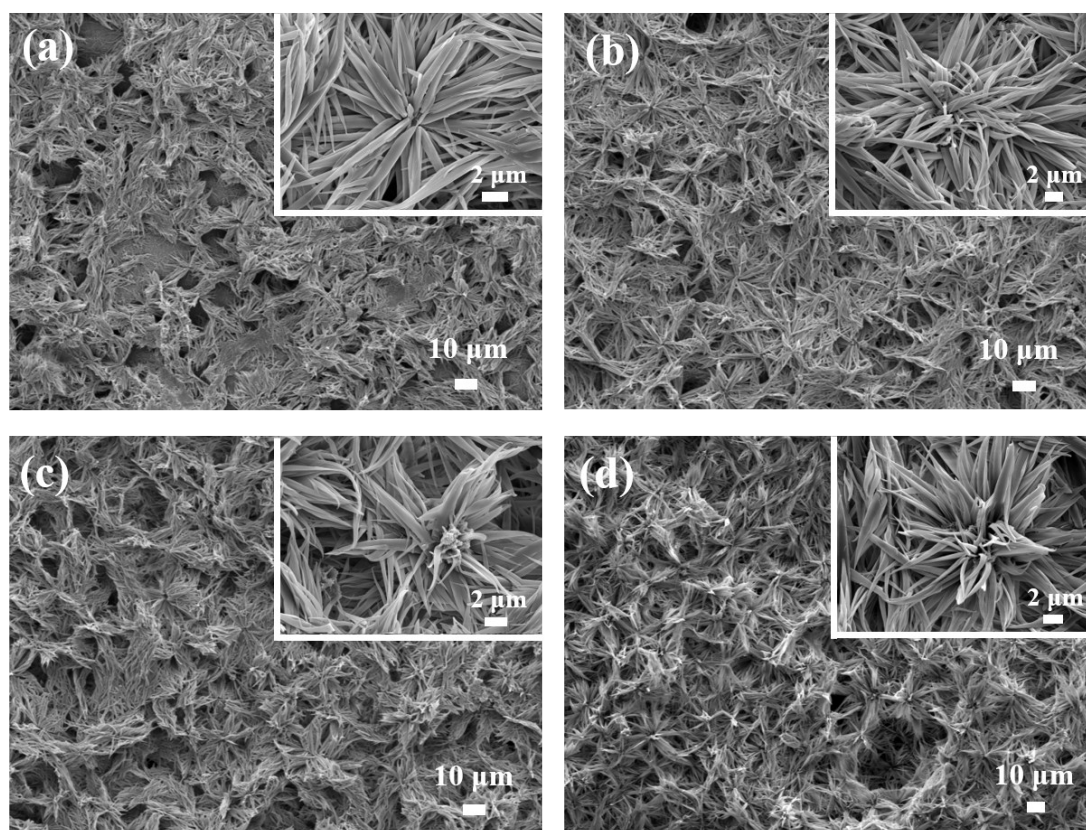

**Fig. S5** SEM images of AOB-Y8 surfaces prepared from (a) 1 mg/mL, (b) 2 mg/mL, (c) 3 mg/mL and (d) 5 mg/mL in 50:50  $\text{CHCl}_3:\text{CH}_3\text{CN}$  solution on silicon substrates at  $25^\circ\text{C}$ .

**Table S1** Advancing angle ( $\theta_{adv}$ ), receding angle ( $\theta_{rec}$ ) and contact angle hysteresis for surfaces prepared with different concentration of AOB-Y8 in 50:50  $\text{CHCl}_3/\text{CH}_3\text{CN}$  mixed solvent.

| Concentration (mg/mL) | $\theta_{adv}/\text{deg}$ | $\theta_{rec}/\text{deg}$ | Hysteresis/deg |
|-----------------------|---------------------------|---------------------------|----------------|
| 1                     | 150.68                    | 130.19                    | 20.49          |
| 2                     | 153.82                    | 144.35                    | 9.47           |
| 3                     | 155.86                    | 152.82                    | 3.04           |
| 4                     | 158.34                    | 155.73                    | 2.61           |
| 5                     | 159.46                    | 156.94                    | 2.52           |
| 6                     | 159.40                    | 157.13                    | 2.27           |

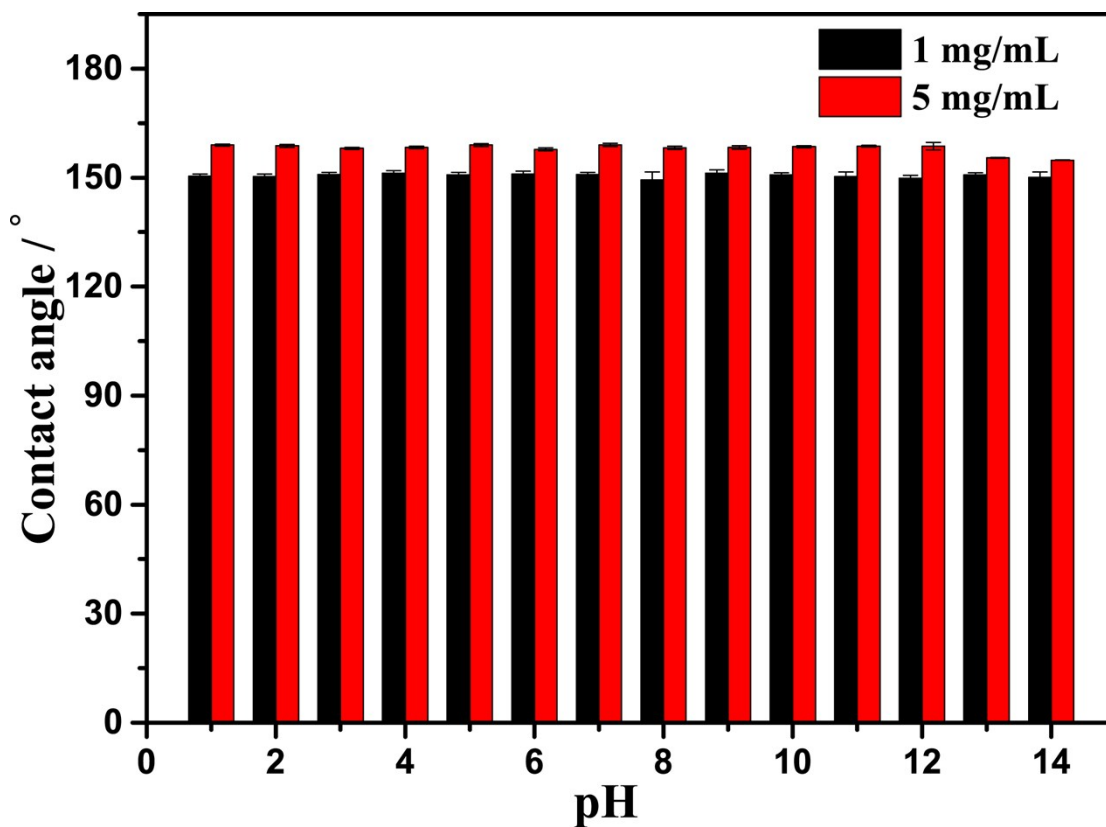

**Fig. S6** Statistics contact angles for a water droplet with different pH values on the surfaces prepared from 50:50  $\text{CHCl}_3/\text{CH}_3\text{CN}$  mixtures with the concentrations of 1 mg/mL and 5 mg/mL, respectively.

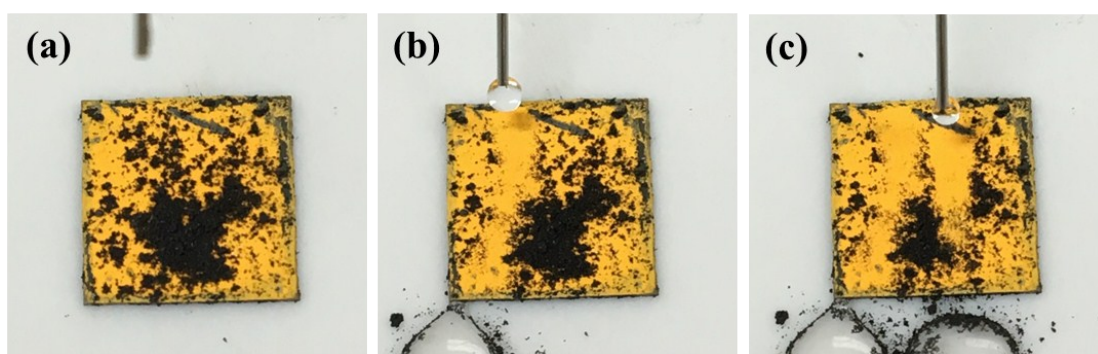

**Fig. S7** Self-cleaning effect experiments: (a) dusted with carbon powder, (b) cleaned with 3 water droplets and (c) cleaned with 6 water droplets.

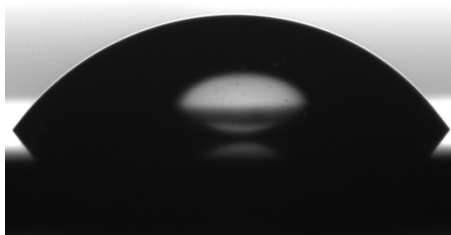

**Fig. S8** Water CA photographs of the silicon plates cleaned by  $\text{CHCl}_3$ .

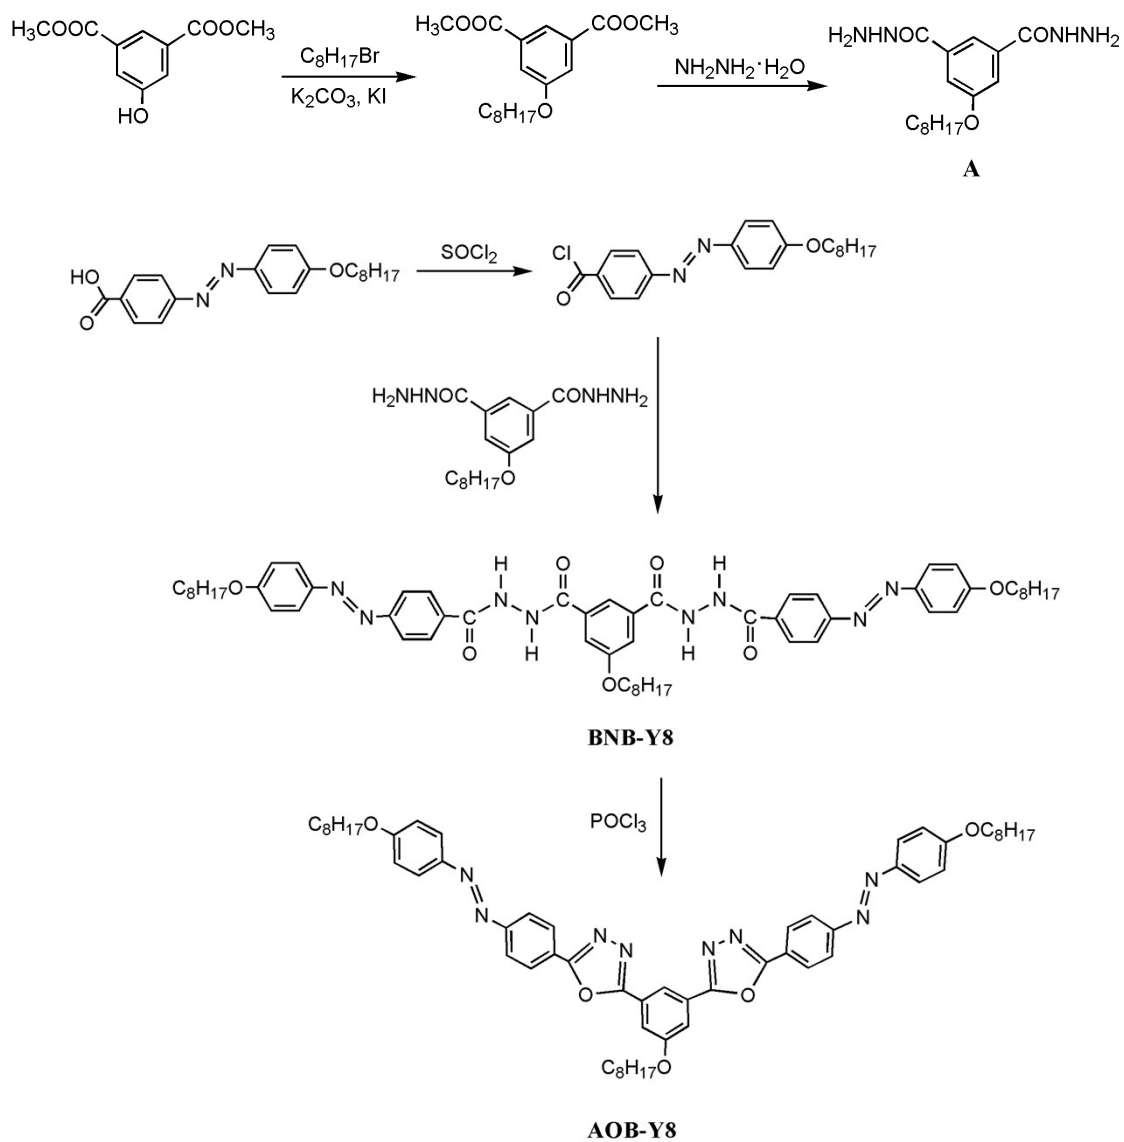

**Scheme S1** Synthetic route for AOB-Y8 compound.
